# Supplementary material for: Predominantly Superior Retinal Tears Detected by B-Scan Ultrasonography
Source: J Ophthalmol. 2019 Jun 11;2019:7105246. doi: 10.1155/2019/7105246 (PMC6594307; doi:10.1155/2019/7105246)
Supplement: Supplementary Materials — The supplementary file includes the data that support the findings of this study. [file 7105246.f1.xlsx]

## Sheet: Feuil1
Numéro du patient	Nom Prénom (à supprimer)	Age	Sexe	Œil atteint	LA (mm)	Oeil phaque	DPV		HIV	Hémorragie rétro-hyaloïde	Déchirures multiples	localisation	Adhérence vitréo-rétinienne en regard	Soulèvement des bords	DR	Corps flottants	Laser	Récidive	Autres
1		56	M	G	NM	O	O	incomplet	O		N	S	O	O		O
2		68	F	G	24.5	N	O	incomplet	O		N	NS	O	O
3		67	F	D	24.85	O	O	incomplet	O		N	TS		O			O	O	déchirure a clapet
4		77	F	G	22.39	N	O	incomplet	O		N	TS		O
5		45	F	G	25.62	O	O	incomplet	O		N	S			O				MYOPE	DR associé
6		55	M	D	27.25	N	O	incomplet	O		N	TI			O
7		56	M	D	NM	O	O	quasi-complet	N		N	TI			N	O			avec opercule
8		72	F	D	NM	N	O	constitué	N		N	TS		O		O
9		43	M	G	28.2	O	O	incomplet	N		N	TI			O		O		MYOPE FORT / déch à clapet
10		66	M	D	25	N	O	incomplet	N		N	S	O						MYOPE
11		67	M	D	24	O	O	Quasi-complet	O		N	TS		N	N
12		71	M	G	23	N	O	incomplet	N		N	S		O	N		O		A CLAPET
										O		TS		O	N		O		A CLAPET
										O		NS		O	N		O		A CLAPET
13		79	F	G	22.67	N	O	incomplet	N		O	NI			N
												NS			N
14		69	F	G	23.13	O	O	incomplet	O	O	N	NS		O	N				A CLAPET
15		69	M	G	25.45	N	O	Quasi-complet	O		N	TS			N
16		73	M	D	27	N	O	Quasi-complet	O	O	N	N			N
17		64	F	D	23.2	O	O	incomplet	N		N	TI			N		O
18		67	F	G	23.58	O	O	incomplet	O		O	TS			N		O	O
												T		O	N				A CLAPET
19		61	F	D	NM	O	O	Quasi-complet	N		N	TS			N				A CLAPET
20		65	M	G	23.69	O	O	incomplet	O		N	TS		O
21		56	M	G	25.22	O	O	incomplet	O		O	TI	O		O
												NS	O		O
22		62	F	G	23.81	O	O	Quasi-complet	O		N	NI			N
23		77	F	G	22.95	O	O	incomplet	O		N	NS	O		N
24		82	F	G	22.7	N	O	incomplet	O		N	NS	O	O
25		55	M	D	26.22	O	O	incomplet	O		N	TS	O	O					MYOPE
26		54	M	G	25.49	O	O	Quasi-complet	O	O	N	NS	O		O
27		63	M	D	23.81	N	O	incomplet	O		N	TI	O		N
28		58	F	D	23.35	O	O	incomplet	O		N	TS	N		N				avec opercule
29		70	M	G	23.38	O	O	incomplet	O	O	N	TS
30		57	M	G	25.58	O	O	incomplet	N		O	TI				O
												NS				O
31		81	F	G	23.96	N	O	incomplet	O		O	S	O
												TS	O
32		79	M	G	25.72	N	O	Quasi-complet	N		N	TI
33		69	M	G	27	N	O	incomplet	O		N	TS	O	O
34		57	F	G	27	O	O	incomplet	O		N	TI	O						avec opercule
35		63	M	G	NM	O	O	Quasi-complet	O		N	S
36		52	M	G	NM	O	O	incomplet	O		N	NS	O	O
37		68	M	G	24.27	O	O	incomplet	O		N	TS
38		79	M	G	24.53	N	O	incomplet	O	O	N	TS	O	O
39		56	M	G	23.83	O	O	incomplet	O		N	NS	O
40		60	F	D	NM	O	O	incomplet	N		N	T	O				O
41		55	M	G	NM	O	O	incomplet	O		N	S					O
42		66	M	D	24.24	O	O	incomplet	O		N	TS							avec opercule / Diabète
43		61	M	G	29.11	O	O	incomplet	N		N	TS	O				O
44		57	F	D	26.61	O	O	incomplet	O		N	TS	O
45		52	F	G	NM	O	O	constitué	N		N	I	O			O
46		60	F	D	NM	O	O	constitué	N		N	S		O			O
47		70	F	D	23.37	O	O	incomplet	O	O	N	TS							avec opercule
48		75	M	G	23.95	N	O	Quasi-complet	O		N	NS	O
49		55	F	G	25.54	O	O	incomplet	O	O	N	TS		O					déchirure en fer à cheval
50		67	M	D	24.01	O	O	incomplet	O		N	S							A CLAPET
51		49	F	D	24.41	O	O	incomplet	O	O	N	TS	O	O
52		77	F	D	23	O	O	incomplet	N		N	TS		O					A CLAPET
53		60	F	G	25.4	O	O	incomplet	O	O	N	NS		O					déchirure en fer à cheval
54		68	F	D	23.2	O	O	incomplet	O		N	TS
55		83	M	D	23.91	O	O	incomplet	O		N	TS							déchirure en fer à cheval
56		61	F	D	25.7	N	O	incomplet	O		N	NS		O					A CLAPET
57		61	F	D	22.77	O	O	Quasi-complet	N		N	TS							avec opercule
58		55	M	G	23.55	O	O	incomplet	O	O	N	TS	O	O					déchirure en fer à cheval
59		61	F	D	23.82	O	O	incomplet	O		N	NS	O				O
60		73	M	G	25.24	O	O	incomplet	O		N	NS
61		76	M	G	NM	N	O	incomplet	O	O	N	T		N
62		78	M	G	23.95	N	O	quasi-complet	O		N	NS	O
63		93	F	D	NM	N	O	incomplet	O			TI
64		60	F	G	25.24	O	O	incomplet	O	O	N	TS		O
65		72	M	D	21.01	O	O	incomplet	O	O	N	NS
66		63	F	D	25.66	O			N			TI		O
67		64	M	D	25	O	O	quasi-complet	O		N	T
68		52	M	D	22.78	O	O	quasi-complet	O		N	S	O	O
69		72	F	D	23.06	O	O	quasi-complet	N		O	TI	O
												T
												S
70		63	F	D	22	N	O	incomplet	O		N	TS	O						A CLAPET
71		58	F	D	26.69	O	O		N		N	NI	O
72		59	F	D	25.63	O	O		O		N	NS	O
73		73	F	G	26.63	O	O		O		N	NS	O
74		85	M	D	NM	N	O		N		N	TS	O
75		85	M	G	NM	N	O		N		N	TS	O
76		80	M	G	23	N	O		O			TI		O
77		55	F	D	25.04	O	O	incomplet	O		N	TS
78		65	F	G	23	N	O	incomplet	O		O	TS	O
												T
79		68	M	G	25.12	O	O		O		N	TS
80		83	M	D	25	N	O		O		O	NS
												NS
												N
												NI
												NI
												NI
81		65	M	D	22.65	O	O				N	TS	O
82		64	M	D	NM	N	O	incomplet	O	O	O	S et NS	O en NS
83		66	M	D	24.06	O	O	incomplet	O	O	N	NS	O	O
84		57	M	G		N	O		O		N	S	O
85		68	F	G	24.76	O	O	incomplet	O	O	N	S	O	O	N
86		73	F	G	24.72	O	O	incomplet	O		N	N	O		N
87		50	M	G	25.28	O	O	incomplet	O	O	N	N	O		N
88		64	F	D	23.82	O	O	incomplet	O		N	NS	O		N		O
89		58	M	D	24.87	O	O	incomplet	O		N	NS	O		N
90		72	M	D	25.42	O	O	incomplet	O	O	N	NS	O	O	N
91		60	M	D	23.91	O	O	incomplet	O	O	O	TS	O		N
												TI	O		N
92		57	M	D	24.18	O	O	incomplet	O		N	TS	O	O	N
93		66	F	D	25.82	O	O	incomplet	O	O	N	TS	O		N
				G	25.33	O	O	complet	O		N	TS	N		N
94		69	M	G	24	O	O	quasi-complet	O	O	N	TS	O		N
95		53	F	D	25.33	O	O	quasi-complet	O		N	S	O	O	N
96		44	M	D	25.3	N	O	incomplet	O		N	N	O		O
97		66	F	G	22.89	O	O	Quasi-complet	O		N	S	O		N
98		57	M	G	29.46	O	O	incomplet	O	O	O	NI	O	N	N
												NS	O	N	N
99		45	F	G	28.27		O	incomplet	O	O	N	S	O		N
100		73	M	G	25.57	O	O	quasi-complet	O	O	N	NI	O		N
101		79	F	D		N	O	incomplet	O	O	N	S	O	O	N				A CLAPET
	MOYENNE :	64.9901			24.6427
	ECART TYPE :	10.0215			1.57403						I	1	0.00847458
		M	54	0.534653		DPV	101	HIV	80		TI	14	0.118644
		F	47	0.465347			1		0.792079		T	6	0.0508475
		TOTAL	101								TS	40	0.338983
											S	17	0.144068
			D	49	0.480392						NS	27	0.228814
			G	53	0.519608						N	5	0.0423729
			TOTAL	102							NI	8	0.0677966
											C	0	0
LEGENDE:					PHAQUE	71	0.70297				TOTAL	118	1
MESURE D APRES ECHO					PSEUDO-PHAQUE	30	0.29703
localisation	TS	S	NS		TOTAL	101
	T	OD	N
	TI	I	NI
N	> NON
O	> OUI
?	> NM
		RESULTATS :	30 PATIENTS			RESULTATS :	59 PATIENTS			RESULTATS :	101 PATIENTS
		LE 27/11/15	64 ans +/- 9			LE 26/02/16	64 ans +/- 9			LE 26/02/16	65 ans +/- 10
			47% F / 53% M				49% F / 51% M				47% F / 53% M
			40% OD / 60% OG				42% OD / 58% OG				48% OD / 52% OG
			LA 24,52 mm +/- 2				LA 24,62 mm +/- 2				LA 24,62 mm +/- 2
			67% phaque / 33% pseudo-phaque				73% phaque / 27% pseudo-phaque				71% phaque / 29% pseudo-phaque
			100% DPV				100% DPV				100% DPV
			73% HIV				75% HIV				79% HIV
		TS	12	0.333333		TS	27	0.41	0.338983	TS	40	34	71	29
		NS	9	0.25		NS	15	0.23	0.220339	NS	26	22	S	I
		TI	7	0.194444		TI	9	0.14	0.152542	S	18	15
		S	4	0.111111		S	9	0.14	0.118644	TI	14	12
		NI	2	0.0555556		NI	2	0.03	0.0677966	NI	8	7
		T	1	0.0277778		T	2	0.0277778	0.0508475	T	6	5
		N	1	0.0277778		N	1	0.02	0.0423729	N	5	4
		I	0	0		I	1	0.02	0.00847458	I	1	1
		C	0	0		C	0	0	0	C	0	0
		TOTAL	36	1		TOTAL	66	1		TOTAL	118	1

## Sheet: Feuil2
				Déchirures suo
				24.5	N	O	incomplet	O		N	NS
				24.85	O	O	incomplet	O		N	TS
				22.39	N	O	incomplet	O		N	TS
				25.62	O	O	incomplet	O		N	S
				25	N	O	incomplet	N		N	S
				24	O	O	Quasi-complet	O		N	TS
				23	N	O	incomplet	N		N	S
				23.13	O	O	incomplet	O	O	N	NS
				25.45	N	O	Quasi-complet	O		N	TS
				23.58	O	O	incomplet	O		O	TS
				23.69	O	O	incomplet	O		N	TS
				22.95	O	O	incomplet	O		N	NS
				22.7	N	O	incomplet	O		N	NS
				26.22	O	O	incomplet	O		N	TS
				25.49	O	O	Quasi-complet	O	O	N	NS
				23.35	O	O	incomplet	O		N	TS
				23.38	O	O	incomplet	O	O	N	TS
				25.58	O	O	incomplet	N		O	TI
											NS
				23.96	N	O	incomplet	O		O	S
				27	N	O	incomplet	O		N	TS
				24.27	O	O	incomplet	O		N	TS
				24.53	N	O	incomplet	O	O	N	TS
				23.83	O	O	incomplet	O		N	NS
				24.24	O	O	incomplet	O		N	TS
				29.11	O	O	incomplet	N		N	TS
				26.61	O	O	incomplet	O		N	TS
				23.37	O	O	incomplet	O	O	N	TS
				23.95	N	O	Quasi-complet	O		N	NS
				25.54	O	O	incomplet	O	O	N	TS
				24.01	O	O	incomplet	O		N	S
				24.41	O	O	incomplet	O	O	N	TS
				23	O	O	incomplet	N		N	TS
				25.4	O	O	incomplet	O	O	N	NS
				23.2	O	O	incomplet	O		N	TS
				23.91	O	O	incomplet	O		N	TS
				25.7	N	O	incomplet	O		N	NS
				22.77	O	O	Quasi-complet	N		N	TS
				23.55	O	O	incomplet	O	O	N	TS
				23.82	O	O	incomplet	O		N	NS
				25.24	O	O	incomplet	O		N	NS
				23.95	N	O	quasi-complet	O		N	NS
				25.24	O	O	incomplet	O	O	N	TS
				21.01	O	O	incomplet	O	O	N	NS
				22.78	O	O	quasi-complet	O		N	S
				22	N	O	incomplet	O		N	TS
				25.63	O	O		O		N	NS
				26.63	O	O		O		N	NS
				25.04	O	O	incomplet	O		N	TS
				23	N	O	incomplet	O		O	TS
				25.12	O	O		O		N	TS
				25	N	O		O		O	NS
				22.65	O	O				N	TS
				24.06	O	O	incomplet	O	O	N	NS
				24.76	O	O	incomplet	O	O	N	S
				25.28	O	O	incomplet	O	O	N	N
				23.82	O	O	incomplet	O		N	NS
				24.87	O	O	incomplet	O		N	NS
				25.42	O	O	incomplet	O	O	N	NS
				23.91	O	O	incomplet	O	O	O	TS
				24.18	O	O	incomplet	O		N	TS
				25.82	O	O	incomplet	O	O	N	TS
				25.33	O	O	complet	O		N	TS
				24	O	O	quasi-complet	O	O	N	TS
				25.33	O	O	quasi-complet	O		N	S
				22.89	O	O	Quasi-complet	O		N	S
			moy	24.3695
			ET	1.06566
			Min	21.01
			Max	29.11
				Déchirures autres
				27.25	N	O	incomplet	O		N	TI
				28.2	O	O	incomplet	N		N	TI
				22.67	N	O	incomplet	N		O	NI
				27	N	O	Quasi-complet	O	O	N	N
				23.2	O	O	incomplet	N		N	TI
				23.81	O	O	Quasi-complet	O		N	NI
				23.81	N	O	incomplet	O		N	TI
				25.72	N	O	Quasi-complet	N		N	TI
				27	O	O	incomplet	O		N	TI
				25.66	O			N			TI
				25	O	O	quasi-complet	O		N	T
				26.69	O	O		N		N	NI
				23	N	O		O			TI
				24.72	O	O	incomplet	O		N	N
				25.28	O	O	incomplet	O	O	N	N
				25.3	N	O	incomplet	O		N	N
				29.46	O	O	incomplet	O	O	O	NI
				25.57	O	O	quasi-complet	O	O	N	NI
			moy	25.5189
			ET	1.43111
			Min	22.67
			Max	29.46
